Development 140, 2245 (2013) doi:10.1242/dev.096974  
© 2013. Published by The Company of Biologists Ltd

## Ptk7 promotes non-canonical Wnt/PCP-mediated morphogenesis and inhibits Wnt/ $\beta$ -catenin-dependent cell fate decisions during vertebrate development

**Madeline Hayes, Mizue Naito, Avais Daulat, Stephane Angers and Brian Ciruna**

There was an error published in *Development* **140**, 1807-1818.

On p. 1813, the title of Fig. 5 should read: *Ptk7* overexpression potentiates exogenous non-canonical Wnt/PCP activity.

The authors apologise to readers for this mistake.
